# Supplementary material for: Pan-Genome Analysis of Effectors in Korean Strains of the Soybean Pathogen Xanthomonas citri pv. glycines
Source: MDPI journal article supplement (doi:10.3390/microorganisms9102065), 2021-09-30
Supplement: s1 [file s1]

**Supplementary Table S1.** The repeat variable di-residues (RVDs) from all transcription activator-like effectors (TALEs) of six *Xanthomonas citri* pv. *glycines* strains using both the HMMER3 program with the Pfam 27.0 database and AnnoTALE program<sup>1</sup>.

| strain name | AnnoTALE name       | HMMER3    | No. of Repeats | RVDs (the 12th and 13th amino acid residues of each repeat region)                              |
|-------------|---------------------|-----------|----------------|-------------------------------------------------------------------------------------------------|
| 8ra         | TalGN3 8ra          | 8ra_1     | 22.5           | NI-HD-NS-NS-NI-NS-NS-HD-NS-NS-HD-HD-HD-NG-NI-NS-HD-HD-NG-HD-HD-NG                               |
|             | TalGM3 8ra          | 8ra_2     | 19.5           | NI-NS-HD-NG-HD-NG-NG-HD-NI-NG-NI-NI-HD-NI-HD-NI-HD-NI-NG-NG                                     |
|             | TalGM4 8ra          | 8ra_3     | 19.5           | NI-NS-HD-NG-HD-NG-NG-HD-NI-NG-NI-NI-HD-NI-HD-NI-HD-NI-NG-NG                                     |
|             | TalGR3 8ra          | 8ra_4     | 18.5           | NI-HD-NS-NS-NI-NS-NS-HD-NS-NI-NG-NI-NI-HD-NI-HD-NI-NG-NG                                        |
|             | TalGO3 8ra          | 8ra_5     | 17.5           | NI-HD-NS-NI-HD-NS-NS-NS-HD-HD-HD-NG-NI-NS-HD-HD-NG                                              |
|             | TalGQ3 8ra          | 8ra_6     | 17.5           | NI-NS-HD-NI-HD-NG-HD-NG-HD-NI-NG-NS-HD-NS-HD-NI-NG-NG                                           |
|             | TalGP3 8ra          | 8ra_7     | 14.5           | NI-NI-NG-HD-NG-NG-HD-NI-NS-HD-NS-HD-NI-NG-NG                                                    |
|             | TalED3 8ra          | 8ra_8     | 4.5            | NI-HD-NI-NG-NG                                                                                  |
| K2          | TalGN3 K2           | K2_1      | 22.5           | NI-HD-NS-NS-NI-NS-NS-HD-NS-NS-HD-HD-HD-NG-NI-NS-HD-HD-NG-HD-HD-NG                               |
|             | TalGR3 K2           | K2_2      | 18.5           | NI-HD-NS-NS-NI-NS-NS-HD-NS-NI-NG-NI-NI-HD-NI-HD-NI-NG-NG                                        |
|             | TalGO3 K2           | K2_3      | 17.5           | NI-HD-NS-NI-HD-NS-NS-NS-HD-HD-HD-NG-NI-NS-HD-HD-NG                                              |
|             | TalGQ3 K2           | K2_4      | 17.5           | NI-NS-HD-NI-HD-NG-HD-NG-HD-NI-NG-NS-HD-NS-HD-NI-NG-NG                                           |
|             | TalGP3 K2           | K2_5      | 14.5           | NI-NI-NG-HD-NG-NG-HD-NI-NS-HD-NS-HD-NI-NG-NG                                                    |
|             |                     | K2_6      | 7              | NI-NI-HD-NI-HD-NI-HD                                                                            |
|             |                     | K2_7      | 3.5            | NI-NS-HD-NG                                                                                     |
|             |                     | K2_8      |                |                                                                                                 |
| SL1017      | TalGN3 SL1017       | SL1017_1  | 22.5           | NI-HD-NS-NS-NI-NS-NS-HD-NS-NS-HD-HD-HD-NG-NI-NS-HD-HD-NS-HD-HD-NG                               |
|             | TalGM3 SL1017       | SL1017_2  | 19.5           | NI-NS-HD-NG-HD-NG-NG-HD-NI-NG-NI-NI-HD-NI-HD-NI-HD-NI-NG-NG                                     |
|             | TalGR3 SL1017       | SL1017_3  | 18.5           | NI-HD-NS-NS-NI-NS-NS-HD-NS-NI-NG-NI-NI-HD-NI-HD-NI-NG-NG                                        |
|             | TalGO3 SL1017       | SL1017_4  | 17.5           | NI-HD-NS-NI-HD-NS-NS-NS-HD-HD-HD-NG-NI-NS-HD-HD-NG                                              |
|             | TalGO4 SL1017       | SL1017_5  | 17.5           | NI-HD-NS-NI-HD-NS-NS-NS-HD-HD-HD-NG-NI-NS-HD-HD-NG                                              |
|             | TalHQ1 SL1017       | SL1017_6  | 16.5           | NI-NS-HD-NI-HD-NG-HD-NG-HD-NG-NS-HD-NI-HD-NI-NG-NG                                              |
|             | TalGP3 SL1017       | SL1017_7  | 14.5           | NI-NI-NG-HD-NG-NG-HD-NI-NS-HD-NS-HD-NI-NG-NG                                                    |
|             | pGR4 SL1017(pseud)  | SL1017_8  | 12.5           | NS-HD-NS-NI-NG-NI-NI-HD-NI-HD-NI-NG-NG                                                          |
|             | TalGO5 SL1017       | SL1017_9  | 6.5            | NI-HD-NS-NI-HD-NS-NS                                                                            |
|             |                     | SL1017_10 | 4.5            | NI-HD-NS-NS-NI                                                                                  |
|             |                     | SL1017_11 | 1.5            | HD-HD                                                                                           |
|             |                     | SL1017_12 | 0.5            | NG                                                                                              |
| SL1018      | TalGN3 SL1018       | SL1018-1  | 34.5           | NI-HD-NS-NS-NI-NS-NS-HD-NS-NS-HD-HD-HD-NG-NI-NS-HD-HD-NS-HD-HD-NS-NS-NS-HD-HD-NG-NI-NS-HD-HD-NG |
|             | TalGM3 SL1018       | SL1018-2  | 19.5           | NI-NS-HD-NG-HD-NG-NG-HD-NI-NG-NI-NI-HD-NI-HD-NI-HD-NI-NG-NG                                     |
|             | TalGM4 SL1018       | SL1018-3  | 19.5           | NI-NS-HD-NG-HD-NG-NG-HD-NI-NG-NI-NI-HD-NI-HD-NI-HD-NI-NG-NG                                     |
|             | TalGQ3 SL1018       | SL1018-4  | 17.5           | NI-NS-HD-NI-HD-NG-HD-NG-HD-NI-NG-NS-HD-NI-HD-NI-NG-NG                                           |
| SL1157      | TalGN3 SL1157       | SL1157_1  | 22.5           | NI-HD-NS-NS-NI-NS-NS-HD-NS-NS-HD-HD-HD-NG-NI-NS-HD-HD-NS-HD-HD-NG                               |
|             | TalGM3 SL1157       | SL1157_2  | 19.5           | NI-NS-HD-NG-HD-NG-NG-HD-NI-NG-NI-NI-HD-NI-HD-NI-HD-NI-NG-NG                                     |
|             | TalGR3 SL1157       | SL1157_3  | 18.5           | NI-HD-NS-NS-NI-NS-NS-HD-NS-NI-NG-NI-NI-HD-NI-HD-NI-NG-NG                                        |
|             | TalGO3 SL1157       | SL1157_4  | 17.5           | NI-HD-NS-NI-HD-NS-NS-NS-HD-HD-HD-NG-NI-NS-HD-HD-NG                                              |
|             | TalGQ3 SL1157       | SL1157_5  | 17.5           | NI-NS-HD-NI-HD-NG-HD-NG-HD-NI-NG-NS-HD-NS-HD-NI-NG-NG                                           |
|             | TalGP3 SL1157       | SL1157_6  | 14.5           | NI-NI-NG-HD-NG-NG-HD-NI-NI-HD-NS-HD-NI-NG-NG                                                    |
|             |                     | SL1157_7  | 14.5           | NI-NS-NS-HD-NS-NI-NG-NI-NI-HD-NI-HD-NI-NG-NG                                                    |
|             |                     | SL1157_8  | 0.5            | NI                                                                                              |
| SL1045      | IGM3 SL1045 (pseud) | 1045_1    | 19.5           | NI-NS-HD-NG-HD-NG-NG-HD-NI-NG-NI-NI-HD-NI-HD-NI-HD-NI-NG-NG                                     |
|             | TalGR3 SL1045       | 1045_2    | 18.5           | NI-HD-NS-NS-NI-NI-NS-HD-NS-NI-NG-NI-NI-HD-NI-HD-NI-NG-NG                                        |
|             | IGQ3 SL1045 (pseud) | 1045_3    | 17.5           | NI-NS-HD-NI-HD-NG-HD-NG-HD-NI-NG-NS-HD-NS-HD-NI-NG-NG                                           |
|             | TalGP3 SL1045       | 1045_4    | 14.5           | NI-NI-NG-HD-NG-NG-HD-NI-NS-HD-NS-HD-NI-NG-NG                                                    |
|             |                     | 1045_5    | 12.5           | HD-NI-NG-NI-NI-HD-NI-HD-NI-HD-NI-NG-NG                                                          |
|             |                     | 1045_6    | 9.5            | NI-HD-NS-NS-NI-NI-NS-HD-NS-N*                                                                   |
|             |                     | 1045_7    | 6              | NI-NS-HD-NG-HD-NG                                                                               |
|             |                     | 1045_8    | 5              | NI-HD-NS-NS-NI                                                                                  |
|             |                     | 1045_9    | 3.5            | HD-NI-NG-NG                                                                                     |
|             |                     | 1045_10   | 2.5            | NI-HD-N*                                                                                        |
|             |                     | 1045_11   | 2.5            | HD-HD-NG                                                                                        |
|             |                     | 1045_12   | 0.5            | N*                                                                                              |
|             |                     | 1045_13   | 0.5            | NS                                                                                              |
|             |                     | 1045_14   |                |                                                                                                 |
|             |                     | 1045_15   |                |                                                                                                 |
|             |                     | 1045_16   |                |                                                                                                 |

<sup>1</sup> RVDs in red indicate TALEs that are predicted to be encoded on plasmids.

**Supplementary Table S2.** Clustering of the RVDs from all of the TALEs in Table S1 into six groups based on sequence similarity using the Geneious Alignment program<sup>1,2</sup>.

| TALE group | AnnoTALE name | No. of Repeats | RVDs (the 12th and 13th amino acid residues of each repeat region)                                                  |
|------------|---------------|----------------|---------------------------------------------------------------------------------------------------------------------|
| 2          | TalGN3 8ra    | 22.5           | NI-HD-NS-NS-NI-NS-NS-HD-NS-NS-NS-HD-HD-NG-NI-NS-HD-HD-NG-HD-HD-NG                                                   |
|            | TalGN3 K2     | 22.5           | NI-HD-NS-NS-NI-NS-NS-HD-NS-NS-NS-HD-HD-NG-NI-NS-HD-HD-NG-HD-HD-NG                                                   |
|            | TalGN3 SL1017 | 22.5           | NI-HD-NS-NS-NI-NS-NS-HD-NS-NS-NS-HD-HD-NG-NI-NS-HD-HD- <b>NS</b> -HD-HD-NG                                          |
|            | TalGN3 SL1018 | 34.5           | NI-HD-NS-NS-NI-NS-NS-HD-NS-NS-NS-HD-HD-NG-NI-NS-HD-HD- <b>NS</b> -HD-HD- <b>NS-NS-NS-NS-HD-HD-NG-NI-NS-HD-HD-NG</b> |
|            | TalGN3 SL1157 | 22.5           | NI-HD-NS-NS-NI-NS-NS-HD-NS-NS-NS-HD-HD-NG-NI-NS-HD-HD- <b>NS</b> -HD-HD-NG                                          |
| 6          | TalGM3 8ra    | 19.5           | NI-NS-HD-NG-HD-NG-NG-HD-NI-NG-NI-NI-HD-NI-HD-NI-NG-NG                                                               |
|            | TalGM4 8ra    | 19.5           | NI-NS-HD-NG-HD-NG-NG-HD-NI-NG-NI-NI-HD-NI-HD-NI-NG-NG                                                               |
|            | TalGM3 SL1017 | 19.5           | NI-NS-HD-NG-HD-NG-NG-HD-NI-NG-NI-NI-HD-NI-HD-NI-NG-NG                                                               |
|            | TalGM3 SL1018 | 19.5           | NI-NS-HD-NG-HD-NG-NG-HD-NI-NG-NI-NI-HD-NI-HD-NI-NG-NG                                                               |
|            | TalGM4 SL1018 | 19.5           | NI-NS-HD-NG-HD-NG-NG-HD-NI-NG-NI-NI-HD-NI-HD-NI-NG-NG                                                               |
|            | TalGM3 SL1157 | 19.5           | NI-NS-HD-NG-HD-NG-NG-HD-NI-NG-NI-NI-HD-NI-HD-NI-NG-NG                                                               |
|            | TalGM3 SL1045 | 19.5           | NI-NS-HD-NG-HD-NG-NG-HD-NI-NG-NI-NI-HD-NI-HD-NI-NG-NG                                                               |
|            | K2_6          | 7              | NI-NI-HD-NI-HD-NI-HD                                                                                                |
|            | 1045_5        | 12.5           | HD-NI-NG-NI-NI-HD-NI-HD-NI-NG-NG                                                                                    |
|            | 1045_7        | 6              | NI-NS-HD-NG-HD-NG                                                                                                   |
| 1          | TalGR3 8ra    | 18.5           | NI-HD-NS-NS-NI-NS-NS-HD-NS-NI-NG-NI-NI-HD-NI-HD-NI-NG-NG                                                            |
|            | TalGR3 K2     | 18.5           | NI-HD-NS-NS-NI-NS-NS-HD-NS-NI-NG-NI-NI-HD-NI-HD-NI-NG-NG                                                            |
|            | TalGR3 SL1017 | 18.5           | NI-HD-NS-NS-NI-NS-NS-HD-NS-NI-NG-NI-NI-HD-NI-HD-NI-NG-NG                                                            |
|            | TalGR3 SL1157 | 18.5           | NI-HD-NS-NS-NI-NS-NS-HD-NS-NI-NG-NI-NI-HD-NI-HD-NI-NG-NG                                                            |
|            | TalGR3 SL1045 | 18.5           | NI-HD-NS-NS-NI- <b>NI</b> -NS-HD-NS-NI-NG-NI-NI-HD-NI-HD-NI-NG-NG                                                   |
|            | TalGR4 SL1017 | 12.5           | NS-HD-NS-NI-NG-NI-NI-HD-NI-HD-NI-NG-NG                                                                              |
|            | SL1017_10     | 4.5            | NI-HD-NS-NS-NI                                                                                                      |
|            | SL1157_7      | 14.5           | NI-NS-NS-HD-NS-NI-NG-NI-NI-HD-NI-HD-NI-NG-NG                                                                        |
|            | 1045_6        | 9.5            | NI-HD-NS-NS-NI- <b>NI</b> -NS-HD-NS-N*                                                                              |
|            | 1045_9        | 3.5            | HD-NI-NG-NG                                                                                                         |
| 3          | TalGO3 8ra    | 17.5           | NI-HD-NS-NI-HD-NS-NS-NS-HD-HD-NG-NI-NS-HD-HD-NG                                                                     |
|            | TalGO3 K2     | 17.5           | NI-HD-NS-NI-HD-NS-NS-NS-HD-HD-NG-NI-NS-HD-HD-NG                                                                     |
|            | TalGO3 SL1017 | 17.5           | NI-HD-NS-NI-HD-NS-NS-NS-HD-HD-NG-NI-NS-HD-HD-NG                                                                     |
|            | TalGO3 SL1157 | 17.5           | NI-HD-NS-NI-HD-NS-NS-NS-HD-HD-NG-NI-NS-HD-HD-NG                                                                     |
|            | TalGO4 SL1017 | 17.5           | NI-HD-NS-NI-HD-NS-NS-NS-HD-HD-NG-NI-NS-HD-HD-NG                                                                     |
|            | TalGO5 SL1017 | 6.5            | NI-HD-NS-NI-HD-NS-NS                                                                                                |
|            | K2_7          | 3.5            | NI-NS-HD- -NG                                                                                                       |
|            | SL1017_11     | 1.5            | HD-HD                                                                                                               |
|            | 1045_11       | 2.5            | HD-HD-NG                                                                                                            |
| 4          | TalGQ3 8ra    | 17.5           | NI-NS-HD-NI-HD-NG-HD-NG-HD-NI-NG-NS-HD-NS-HD-NI-NG-NG                                                               |
|            | TalGQ3 K2     | 17.5           | NI-NS-HD-NI-HD-NG-HD-NG-HD-NI-NG-NS-HD-NS-HD-NI-NG-NG                                                               |
|            | TalGQ3 SL1018 | 17.5           | NI-NS-HD-NI-HD-NG-HD-NG-HD-NI-NG-NS-HD- <b>NI</b> -HD-NI-NG-NG                                                      |
|            | TalGQ3 SL1157 | 17.5           | NI-NS-HD-NI-HD-NG-HD-NG-HD-NI-NG-NS-HD-NS-HD-NI-NG-NG                                                               |
|            | TalGQ3 SL1045 | 17.5           | NI-NS-HD-NI-HD-NG-HD-NG-HD-NI-NG-NS-HD-NS-HD-NI-NG-NG                                                               |
|            | TalHQ1 SL1017 | 16.5           | NI-NS-HD-NI-HD-NG-HD-NG-HD- -NG-NS-HD- <b>NI</b> -HD-NI-NG-NG                                                       |
|            | TalED3 8ra    | 4.5            | <b>NI</b> -HD-NI-NG-NG                                                                                              |
| 5          | TalGP3 8ra    | 14.5           | NI-NI-NG-HD-NG-NG-HD-NI-NS-HD-NS-HD-NI-NG-NG                                                                        |
|            | TalGP3 K2     | 14.5           | NI-NI-NG-HD-NG-NG-HD-NI-NS-HD-NS-HD-NI-NG-NG                                                                        |
|            | TalGP3 SL1017 | 14.5           | NI-NI-NG-HD-NG-NG-HD-NI-NS-HD-NS-HD-NI-NG-NG                                                                        |
|            | TalGP3 SL1157 | 14.5           | NI-NI-NG-HD-NG-NG-HD-NI- <b>NI</b> -HD-NS-HD-NI-NG-NG                                                               |
|            | TalGP3 SL1045 | 14.5           | NI-NI-NG-HD-NG-NG-HD-NI-NS-HD-NS-HD-NI-NG-NG                                                                        |

<sup>1</sup>The TALE groups are defined based on the clustering shown in Figure 7, with the addition of shorter and potentially incomplete TALEs from Table S1.

<sup>2</sup> RVDs in blue indicate incomplete TALEs; RVDs in red indicate residues showing differences within the same group.

**Supplementary Table S3.** RVDs of *X. citri* pv. *glycine* TALEs found on plasmids

| strain name            | TALE group | AnnoTALE name | No. of Repeats | RVDs (the 12th and 13th amino acid residues of each repeat region) |
|------------------------|------------|---------------|----------------|--------------------------------------------------------------------|
| 8ra P1<br>(plasmid)    | 6          | TalGM3 8ra    | 19.5           | NI-NS-HD-NG-HD-NG-NG-HD-NI-NG-NI-NI-HD-NI-HD-NI-HD-NI-NG-NG        |
|                        | 6          | TalGM4 8ra    | 19.5           | NI-NS-HD-NG-HD-NG-NG-HD-NI-NG-NI-NI-HD-NI-HD-NI-HD-NI-NG-NG        |
|                        | 4          | TalED3 8ra    | 4.5            | NI-HD-NI-NG-NG                                                     |
|                        |            |               |                |                                                                    |
| SL1017 P1<br>(plasmid) | 1          | TalGR3 SL1017 | 18.5           | NI-HD-NS-NS-NI-NS-NS-HD-NS-NI-NG-NI-NI-HD-NI-HD-NI-NG-NG           |
|                        | 3          | TalGO4 SL1017 | 17.5           | NI-HD-NS-NI-HD-NS-NS-NS-NS-HD-HD-HD-NG-NI-NS-HD-HD-NG              |
| SL1017 P2              | 6          | TalGM3 SL1017 | 19.5           | NI-NS-HD-NG-HD-NG-NG-HD-NI-NG-NI-NI-HD-NI-HD-NI-HD-NI-NG-NG        |
|                        |            |               |                |                                                                    |
| SL1018 P1<br>(plasmid) | 6          | TalGM3 SL1018 | 19.5           | NI-NS-HD-NG-HD-NG-NG-HD-NI-NG-NI-NI-HD-NI-HD-NI-HD-NI-NG-NG        |
|                        | 6          | TalGM4 SL1018 | 19.5           | NI-NS-HD-NG-HD-NG-NG-HD-NI-NG-NI-NI-HD-NI-HD-NI-HD-NI-NG-NG        |
|                        |            |               |                |                                                                    |
| SL1157 P1<br>(plasmid) | 6          | TalGM3 SL1157 | 19.5           | NI-NS-HD-NG-HD-NG-NG-HD-NI-NG-NI-NI-HD-NI-HD-NI-HD-NI-NG-NG        |
|                        | 1          | TalGR3 SL1157 | 18.5           | NI-HD-NS-NS-NI-NS-NS-HD-NS-NI-NG-NI-NI-HD-NI-HD-NI-NG-NG           |
|                        |            |               |                |                                                                    |
| SL1045 P1<br>(plasmid) | 6          | TalGM3 SL1045 | 19.5           | NI-NS-HD-NG-HD-NG-NG-HD-NI-NG-NI-NI-HD-NI-HD-NI-HD-NI-NG-NG        |
